# Supplementary material for: Comparison of Indexes to Measure Comorbidity Burden and Predict All-Cause Mortality in Rheumatoid Arthritis
Source: MDPI journal article supplement (doi:10.3390/jcm10225460), 2021-11-22
Supplement: s1 [file s1]

**Table S1.** Comparison of comorbidity indexes in patients with rheumatoid arthritis.

| Author, year of publication (Ref) | Country                                                                                                                                  | Study design | No. of RA patients | Comorbidity index                                                       | Summary of the study                                                                                                                                      |
|-----------------------------------|------------------------------------------------------------------------------------------------------------------------------------------|--------------|--------------------|-------------------------------------------------------------------------|-----------------------------------------------------------------------------------------------------------------------------------------------------------|
|                                   | US                                                                                                                                       |              |                    |                                                                         |                                                                                                                                                           |
| England et al., 2015 (20)         | Veterans Affairs Rheumatoid Arthritis (VARA) registry and the Rheumatology and Arthritis Investigator's Network Database (RAIN-DB)<br>US | Cohort       | 4765               | RDCI, CDI, FCI, ETS, EPS, and COUNT                                     | ETS and RDCI best predicted death. The FCI best predicted function                                                                                        |
| Radner et al., 2015 (18)          | Brigham and Women's Rheumatoid Arthritis Sequential Study (BRASS) and COMorbidities in Rheumatoid Arthritis Study (COMORA)<br>Norway     | Cohort       | 876                | MMI.count, MMI.weight, MMI.weight using beta-coefficients, CCI, and FCI | MMI based on EQ-5D performed better than CCI. Not much improvement was obtained by weighting.                                                             |
| Putrik et al., 2018 (25)          | Norwegian Register-DMARD study (patients with inflammatory joint diseases treated with DMARDs)<br>UK                                     | Cohort       | 4126               | RDCI, CDI, FCI                                                          | Three indexes performed comparably well. CDI performing slightly worse when predicting functioning and health.                                            |
| Nikiphorou et al., 2019 (26)      | The Royal College of General Practitioners (RCGP) Research and Surveillance Centre (RSC) database<br>US                                  | Cohort       | 6591               | CCI, RDCI                                                               | In early RA, both the RDCI and CCI were associated with an increased risk of all-cause mortality. RDCI predicts all-cause mortality better than CCI.      |
| England et al., 2021 (27)         | Commercial insurance database (MarketScan)                                                                                               | Cohort       | 138891             | CCI, RDCI                                                               | CCI and RDCI showed a higher burden of multimorbidity in RA. Similar findings were obtained when requiring $\geq 1$ year of follow-up after RA diagnosis. |

Abbreviations: Rheumatic Disease Comorbidity Index (RDCI) with the Charlson-Deyo Index (CDI), functional comorbidity index (FCI), Elixhauser Total Score (ETS), Elixhauser Point System (EPS), simple comorbidity count (COUNT), counted multimorbidity index (MMI.count), weighted multimorbidity index (MMI.weight), MMI.weight using beta-coefficients (weighted multimorbidity index using beta-coefficients), Charlson comorbidity index (CCI).

**Table S2.** The formula of four comorbidity indexes.

| Index                                 | Number of conditions | Formula                                                                                                                                                                                                                                                                                                                                                                                                                                                                                                                                                                                                                                             |
|---------------------------------------|----------------------|-----------------------------------------------------------------------------------------------------------------------------------------------------------------------------------------------------------------------------------------------------------------------------------------------------------------------------------------------------------------------------------------------------------------------------------------------------------------------------------------------------------------------------------------------------------------------------------------------------------------------------------------------------|
| Dartmouth-Manitoba's CCI (range 0–33) | 17                   | $6 \times (\text{metastatic solid tumor} + \text{acquired immune deficiency syndrome})$ $+ 3 \times (\text{severe or moderate liver disease})$ $+ 2 \times (\text{hemiplegia} + \text{renal disease} + \text{diabetes with chronic complications} + \text{any malignancy, including leukemia and lymphoma})$ $+ 1 \times (\text{myocardial infarction} + \text{congestive heart failure} + \text{peripheral vascular disease} + \text{cerebrovascular disease} + \text{dementia} + \text{chronic obstructive pulmonary disease} + \text{connective tissue disease} + \text{ulcer} + \text{mild liver disease} + \text{diabetes, mild to moderate})$ |

|                                              |    |                                                                                                                                                                                                                                                                                                                                                                                                                                                                                                                                                                                                                                                                                                                                                                        |
|----------------------------------------------|----|------------------------------------------------------------------------------------------------------------------------------------------------------------------------------------------------------------------------------------------------------------------------------------------------------------------------------------------------------------------------------------------------------------------------------------------------------------------------------------------------------------------------------------------------------------------------------------------------------------------------------------------------------------------------------------------------------------------------------------------------------------------------|
| Elixhauser point system<br>(range -19 to 89) | 30 | 12 × metastatic cancer<br>+11 × liver disease<br>+9 × lymphoma<br>+7 × (congestive heart failure + paralysis)<br>+6 × (weight loss + other neurological disorder)<br>+5 × (cardiac arrhythmias + renal failure + fluid or electrolyte disorder)<br>+4 × (pulmonary circulation disorder + solid tumor without metastasis)<br>+3 × (chronic pulmonary disease + coagulopathy)<br>+2 × peripheral vascular disease<br>+0 × (acquired immune deficiency syndrome + alcohol abuse + diabetes, complicated + diabetes, uncomplicated + hypertension + hypothyroidism + peptic ulcer disease + psychoses + RA/collagen vascular disease)<br>- 1 × valvular disease<br>- 2 × (blood loss anemia + deficiency anemia)<br>- 3 × depression<br>- 4 × obesity<br>- 7 × drug abuse |
| Counted MMI<br>(range 1–12)                  | 12 | 1 × (hypertension + obesity + depression + cancer + diabetes mellitus + asthma + coronary heart disease + viral hepatitis + chronic obstructive pulmonary disease + chronic kidney disease + diverticulitis + stroke)<br>2 × lung disease + [2 × (heart attack, other cardiovascular disease, or stroke) or 1 × hypertension] + fracture + depression + diabetes + cancer + (ulcer or stomach problem)                                                                                                                                                                                                                                                                                                                                                                 |
| RDCI (range 0–9)                             | 11 |                                                                                                                                                                                                                                                                                                                                                                                                                                                                                                                                                                                                                                                                                                                                                                        |

**Table S3.** Comparison of the different comorbidity indexes.

|                                                         | CDI                                                                           | ECI                                                     | MMI                                                                          | RDCI                                              |
|---------------------------------------------------------|-------------------------------------------------------------------------------|---------------------------------------------------------|------------------------------------------------------------------------------|---------------------------------------------------|
| Number of diseases                                      | 19                                                                            | 30                                                      | 40                                                                           | 11                                                |
| Original outcome                                        | One-year mortality                                                            | Hospital stay, cost, and mortality                      | Quality of life                                                              | Mortality, hospitalization, disability, and costs |
| Unique disease                                          | Dementia                                                                      | Alcohol related disease, obesity, and thyroid disorders | Blindness, dementia, alcohol related disease, obesity, and thyroid disorders | Fracture                                          |
| Common disease                                          | Lung disease, stroke, cancer, heart failure, diabetes, coronary heart disease |                                                         |                                                                              |                                                   |
| Number of papers about rheumatoid arthritis before 2018 | Numerous                                                                      | 2                                                       | 1                                                                            | 2                                                 |
| Dementia                                                | O                                                                             | X                                                       | O                                                                            | X                                                 |
| Epilepsy                                                | X                                                                             | O                                                       | O                                                                            | X                                                 |
| Liver disease                                           | O                                                                             | O                                                       | O                                                                            | X                                                 |
| Lung disease                                            | O                                                                             | O                                                       | O                                                                            | O                                                 |
| Blindness                                               | X                                                                             | X                                                       | O                                                                            | X                                                 |
| Renal disease                                           | O                                                                             | O                                                       | O                                                                            | X                                                 |
| Substance/alcohol use                                   | X                                                                             | O                                                       | O                                                                            | X                                                 |
| Depression                                              | X                                                                             | O                                                       | O                                                                            | O                                                 |
| Heart failure                                           | O                                                                             | O                                                       | O                                                                            | O                                                 |
| Obesity                                                 | X                                                                             | O                                                       | O                                                                            | X                                                 |
| Thyroid disorder                                        | X                                                                             | O                                                       | O                                                                            | X                                                 |
| Stroke                                                  | O                                                                             | O                                                       | O                                                                            | O                                                 |
| Cancer                                                  | O                                                                             | O                                                       | O                                                                            | O                                                 |
| Diabetes                                                | O                                                                             | O                                                       | O                                                                            | O                                                 |
| Connective tissue disease                               | O                                                                             | O                                                       | X                                                                            | X                                                 |

O Comorbidity which is included in the comorbidity index. X Comorbidity which is not included in the comorbidity index

**Table S4.** Characteristics of matched control group and comorbidity prevalence.

| Characteristic                                            | Value         |     |     |     |      |
|-----------------------------------------------------------|---------------|-----|-----|-----|------|
| N                                                         | 99,068        |     |     |     |      |
| Male, n(%)                                                | 20,560 (20.8) |     |     |     |      |
| Age years, mean±SD                                        | 50.1±15.7     |     |     |     |      |
| Comorbidity indexes, mean±SD                              |               |     |     |     |      |
| CCI                                                       | 0.6±1.3       |     |     |     |      |
| ECI                                                       | 1.7±4.2       |     |     |     |      |
| MMI                                                       | 0.5±0.9       |     |     |     |      |
| RDCI                                                      | 0.8±1.3       |     |     |     |      |
| Place of residence, n(%)                                  |               |     |     |     |      |
| Urban                                                     | 57,975 (58.5) |     |     |     |      |
| Suburban                                                  | 29,157 (29.4) |     |     |     |      |
| Rural                                                     | 8,835 (8.9)   |     |     |     |      |
| Unknown                                                   | 3,101 (3.1)   |     |     |     |      |
| Income levels, n(%)                                       |               |     |     |     |      |
| Quintile 1                                                | 17,993 (18.2) |     |     |     |      |
| Quintile 2                                                | 10,626 (10.7) |     |     |     |      |
| Quintile 3                                                | 33,629 (34.0) |     |     |     |      |
| Quintile 4                                                | 16,690 (16.9) |     |     |     |      |
| Quintile 5                                                | 19,485 (19.7) |     |     |     |      |
| Unknown                                                   | 645 (0.7)     |     |     |     |      |
| Occupation, n(%)                                          |               |     |     |     |      |
| Dependents of the insured individuals                     | 26,316 (26.6) |     |     |     |      |
| Civil servants, teachers, military personnel and veterans | 4,051 (4.1)   |     |     |     |      |
| Non-manual workers and professionals                      | 25,388 (25.6) |     |     |     |      |
| Manual workers                                            | 35,316 (35.7) |     |     |     |      |
| Other                                                     | 7,997 (8.1)   |     |     |     |      |
| Comorbidity Prevalence, %                                 |               | CCI | ECI | MMI | RDCI |
| Hypertension                                              | 16.79%        |     | V   | V   |      |
|                                                           | 13.30%        |     |     |     | V    |
| Ulcer or stomach problem                                  | 14.19%        |     |     |     | V    |
| Other cardiovascular                                      | 9.83%         |     |     |     | V    |
| Diabetes                                                  | 7.67%         |     |     | V   | V    |
| Diabetes Uncomplicated (mild to moderate)                 | 6.04%         | V   | V   |     |      |
| Ulcer disease                                             | 4.75%         | V   |     |     |      |
| Coronary heart disease                                    | 4.48%         |     |     | V   |      |
| Lung disease                                              | 4.22%         |     |     |     | V    |
| Chronic Pulmonary Disease                                 | 3.69%         |     | V   |     |      |
| Liver Disease                                             | 3.57%         |     | V   |     |      |
| Peptic Ulcer Disease excluding bleeding                   | 3.54%         |     | V   |     |      |
| Chronic pulmonary disease                                 | 3.15%         | V   |     |     |      |
| Cerebrovascular disease                                   | 2.74%         | V   |     |     |      |
| Diabetes with chronic complications                       | 2.58%         | V   | V   |     |      |
| Chronic obstructive pulmonary disease                     | 2.24%         |     |     | V   |      |
| Cancer                                                    | 2.18%         |     |     | V   | V    |
| Any tumor                                                 | 2.05%         | V   |     |     |      |
| Solid Tumor without Metastasis                            | 1.99%         |     | V   |     |      |
| Depression                                                | 1.90%         |     |     | V   |      |
|                                                           | 1.78%         |     |     |     | V    |
| Stroke                                                    | 1.80%         |     |     |     | V    |
|                                                           | 1.03%         |     |     | V   |      |
| Cardiac Arrhythmia                                        | 1.76%         |     | V   |     |      |
| Asthma                                                    | 1.63%         |     |     | V   |      |
| Congestive heart failure                                  | 1.29%         | V   |     |     |      |
| Congestive Heart Failure                                  | 1.22%         |     | V   |     |      |
| Viral hepatitis                                           | 1.14%         |     |     | V   |      |
| Valvular Disease                                          | 0.87%         |     | V   |     |      |

|                                     |       |   |   |   |   |
|-------------------------------------|-------|---|---|---|---|
| Mild liver disease                  | 0.82% | V |   |   |   |
| Other Neurological Disorders        | 0.8%  |   | V |   |   |
| Renal Failure                       | 0.78% |   | V |   |   |
| Renal disease                       | 0.75% | V |   |   |   |
| Chronic Kidney Disease              | 0.69% |   |   | V |   |
| Psychoses                           | 0.65% |   | V |   |   |
| Dementia                            | 0.55% | V |   |   |   |
| Fracture spine, hip, or leg         | 0.54% |   |   |   | V |
| Peripheral vascular disease         | 0.52% | V |   |   |   |
|                                     | 0.50% |   | V |   |   |
| Hypothyroidism                      | 0.51% |   | V |   |   |
| Myocardial infarction               | 0.49% |   |   |   | V |
| Fluid and Electrolyte Disorders     | 0.46% |   | V |   |   |
| Deficiency Anemia                   | 0.40% |   | V |   |   |
| Paralysis                           | 0.33% |   | V |   |   |
| Hemiplegia                          | 0.31% | V |   |   |   |
| Metastatic solid tumor              | 0.30% | V |   |   |   |
| Metastatic Cancer                   | 0.30% |   | V |   |   |
| Myocardial infarct                  | 0.23% | V |   |   |   |
| Alcohol Abuse                       | 0.18% |   | V |   |   |
| Blood Loss Anemia                   | 0.12% |   | V |   |   |
| Moderate or severe liver disease    | 0.12% | V |   |   |   |
| Weight Loss                         | 0.10% |   | V |   |   |
| Obesity                             | 0.10% |   | V | V |   |
| Coagulopathy                        | 0.09% |   | V |   |   |
| Pulmonary Circulation Disorders     | 0.09% |   | V |   |   |
| Lymphoma                            | 0.05% |   | V |   |   |
| Diverticulitis                      | 0.03% |   |   | V |   |
| Drug Abuse                          | 0.02% |   | V |   |   |
| Acquired immune deficiency syndrome | 0.01% | V | V |   |   |

Abbreviations: Charlson Comorbidity Index (CCI), Elixhauser Comorbidity Index (ECI), Multimorbidity Index (MMI), Rheumatic Disease Comorbidity Index (RDCI). \* The same comorbidity has a different prevalence rate is due to the ICD code defined by different formulas of index. (Supplementary table 1).

**Table S5.** One-year and 5-year mortality analyses of the four comorbidity indexes in matched control group.

| Comorbidity indexes | Patient number (%) | Mortality rate (per 1000 people) |        | Crude HR (95% CI) for death |                 | Age- and sex-adjusted HR (95% CI) for death |                 |
|---------------------|--------------------|----------------------------------|--------|-----------------------------|-----------------|---------------------------------------------|-----------------|
|                     |                    | 1-Year                           | 5-Year | 1-Year                      | 5-Year          | 1-Year                                      | 5-Year          |
| CCI                 |                    |                                  |        |                             |                 |                                             |                 |
| Low score (0-1)     | 86,680 (87.5)      | 5.2                              | 28.8   | 1.0 (Reference)             | 1.0 (Reference) | 1.0 (Reference)                             | 1.0 (Reference) |
| High score (≥2)     | 12,388 (12.5)      | 16.6                             | 165    | 3.2 (2.7-3.8)               | 6.1 (5.8-6.5)   | 1.7 (1.5-2.1)                               | 2.9 (2.8-3.1)   |
| ECI                 |                    |                                  |        |                             |                 |                                             |                 |
| Low score (0-3)     | 79,584 (80.3)      | 5.7                              | 29.9   | 1.0 (Reference)             | 1.0 (Reference) | 1.0 (Reference)                             | 1.0 (Reference) |
| High Score (≥3)     | 19,484 (19.7)      | 10.4                             | 110.8  | 1.8 (1.5-2.1)               | 3.8 (3.6-4.1)   | 1.1 (0.9-1.3)                               | 2.1 (2.0-2.2)   |
| MMI                 |                    |                                  |        |                             |                 |                                             |                 |
| Low score (0-1)     | 68,429 (69.1)      | 6.2                              | 25     | 1.0 (Reference)             | 1.0 (Reference) | 1.0 (Reference)                             | 1.0 (Reference) |
| High score (≥1)     | 30,639 (30.9)      | 7.6                              | 92.3   | 1.2 (1.0-1.4)               | 3.8 (3.6-4.0)   | 0.6 (0.5-0.7)                               | 1.7 (1.6-1.8)   |
| RDCI                |                    |                                  |        |                             |                 |                                             |                 |
| Low score (0-2)     | 75,208 (75.9)      | 5.9                              | 27.5   | 1.0 (Reference)             | 1.0 (Reference) | 1.0 (Reference)                             | 1.0 (Reference) |
| High score (≥2)     | 23,860 (24.1)      | 8.9                              | 103.7  | 1.5 (1.3-1.8)               | 3.9 (3.7-4.1)   | 0.7 (0.6-0.9)                               | 1.7 (1.6-1.8)   |

Abbreviations: Charlson Comorbidity Index (CCI), Confidence interval (CI), Elixhauser Comorbidity Index (ECI), Hazard ratio (HR), Multimorbidity Index (MMI), Rheumatic Disease Comorbidity Index (RDCI).

**Table S6.** The discriminant capacity of the four comorbidity indexes for the 1- and 5-year survival in matched control group.

| Models            | 1-Year mortality       |       | 5-Year mortality       |        |
|-------------------|------------------------|-------|------------------------|--------|
|                   | Harrell's c-statistics | AIC   | Harrell's c-statistics | AIC    |
| Base model        | 0.737                  | 7,385 | 0.776                  | 31,791 |
| Base model + CCI  | 0.836                  | 3,829 | 0.813                  | 27,854 |
| Base model + ECI  | 0.817                  | 4,015 | 0.803                  | 28,767 |
| Base model + MMI  | 0.779                  | 4,102 | 0.800                  | 28,857 |
| Base model + RDCI | 0.791                  | 4,146 | 0.795                  | 29,200 |

Abbreviations: Charlson Comorbidity Index (CCI), Elixhauser Comorbidity Index (ECI), Multimorbidity index (MMI), Rheumatic Disease Comorbidity Index (RDCI); The base model included age, sex, income quartile, urbanization, and occupation groups. The Harrell's c-statistics indicates the prediction models, which are as follows: 0.5 (as well as chance), 0.7–0.8 (acceptable), 0.8–0.9 (excellent), and 0.9–1 (outstanding prediction). The AIC statistics was calculated, and a small AIC indicates the better predictive ability of the model.

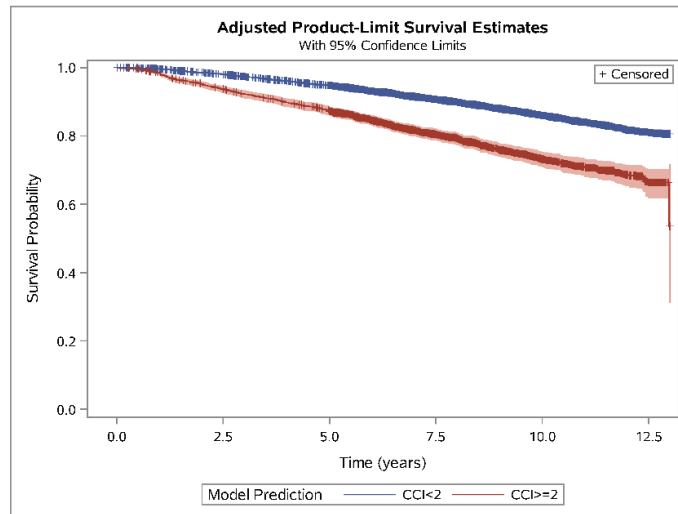

a).

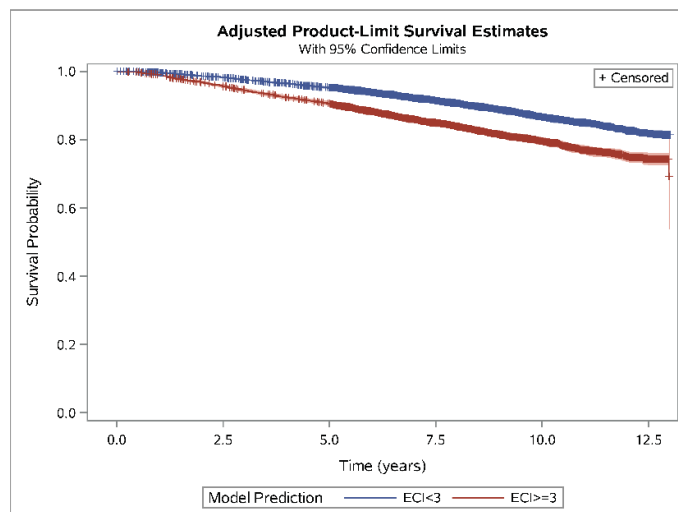

b).

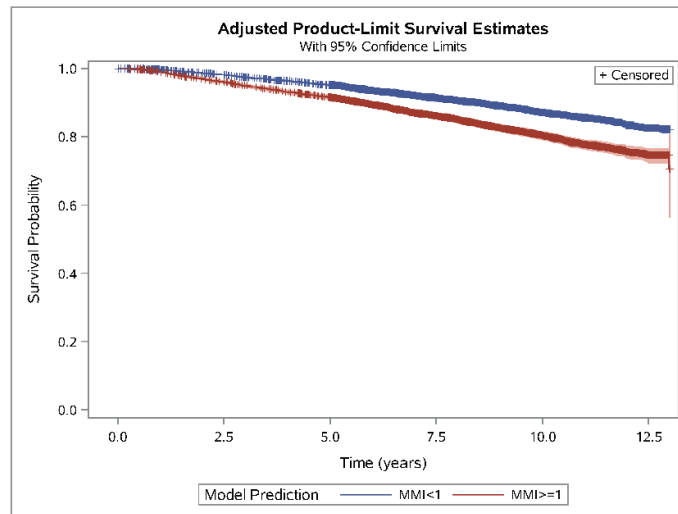

c).

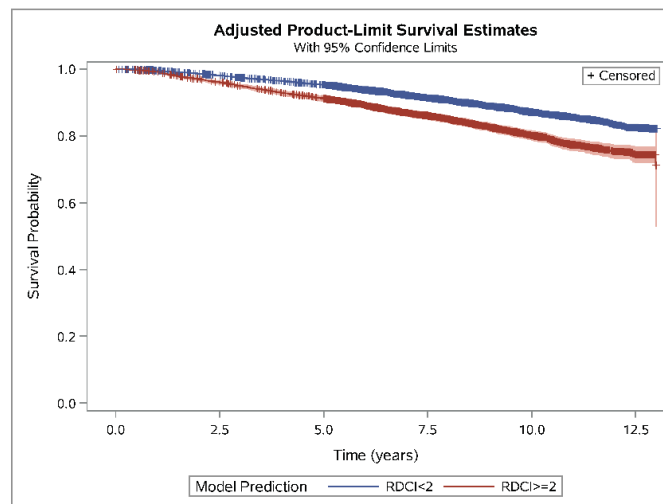

d).

**Figure S1.** The impact of comorbidity on disease-specific survival showed in weighted Kaplan-Meire curve. (a) Charlson Comorbidity Index. (b) Elixhauser Comorbidity Index. (c) Multimorbidity Index. (d) Rheumatic Disease Comorbidity Index. (All log-rank test's p-values <0.001); \*The comorbidity indexes are calculated during the diagnostic period (the period of 4 months before and after the initial diagnosis).

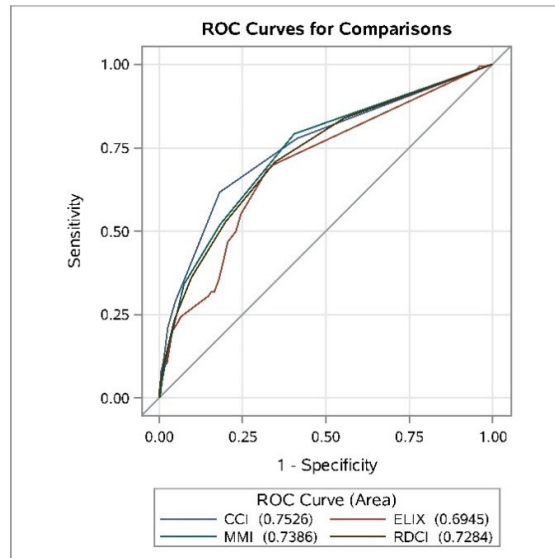

a).

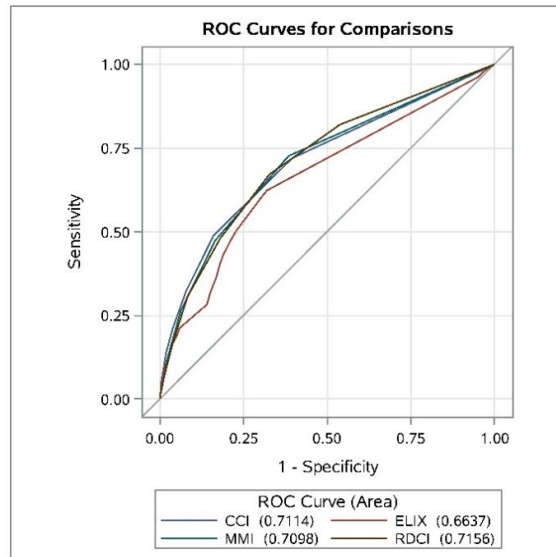

b).

**Table S2.** Receiver Operating Characteristic (ROC) Curve for Prediction of (a) 1-year Mortality and (b) 5-year Mortality by Four Comorbidity Indexes.

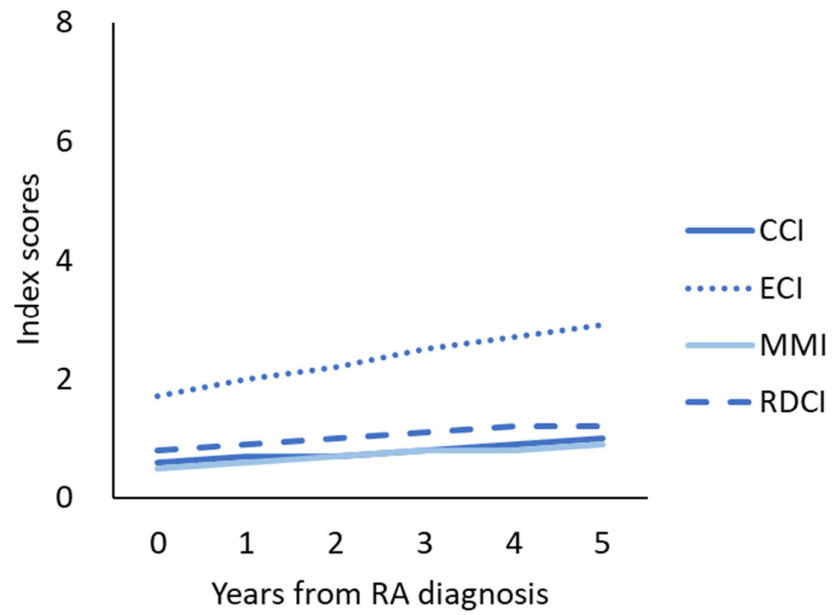

**Figure S3.** The mean scores of the comorbidity indexes according to the index year in matched control group.

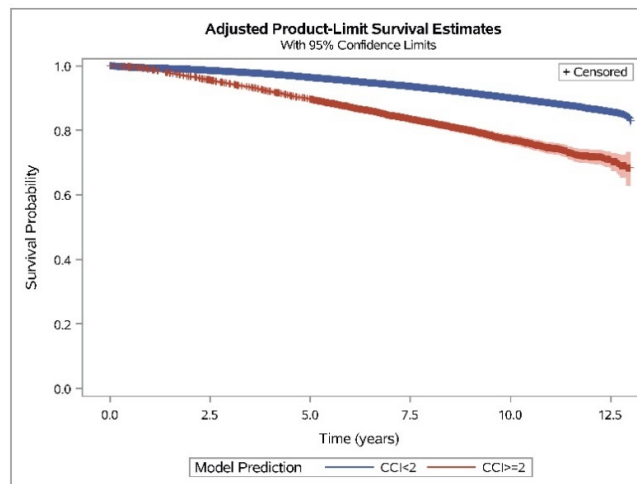

a).

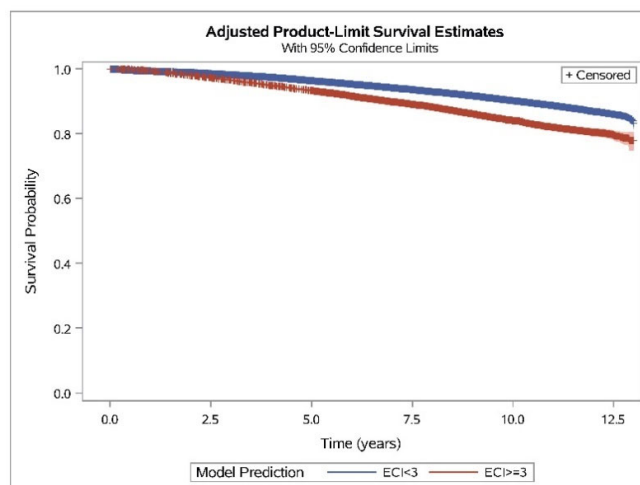

b).

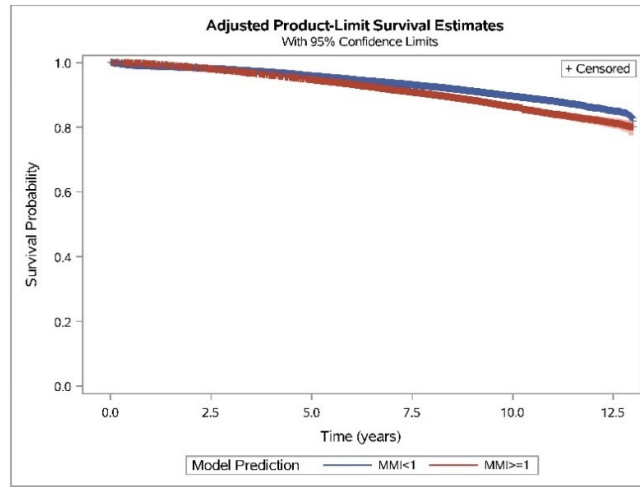

c).

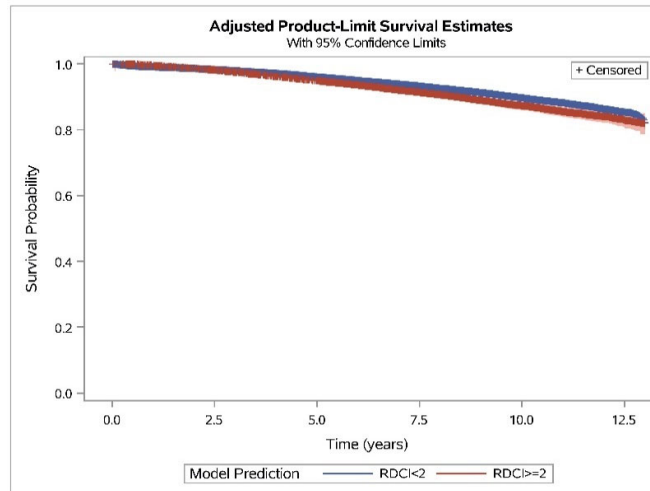

d).

**Figure S4.** The impact of comorbidity on disease-specific survival in matched control group showed in weighted Kaplan-Meire curve. (a) Charlson Comorbidity Index. (b) Elixhauser Comorbidity Index. (c) Multimorbidity Index. (d) Rheumatic Disease Comorbidity Index. (All log-rank test's p-values <0.001).

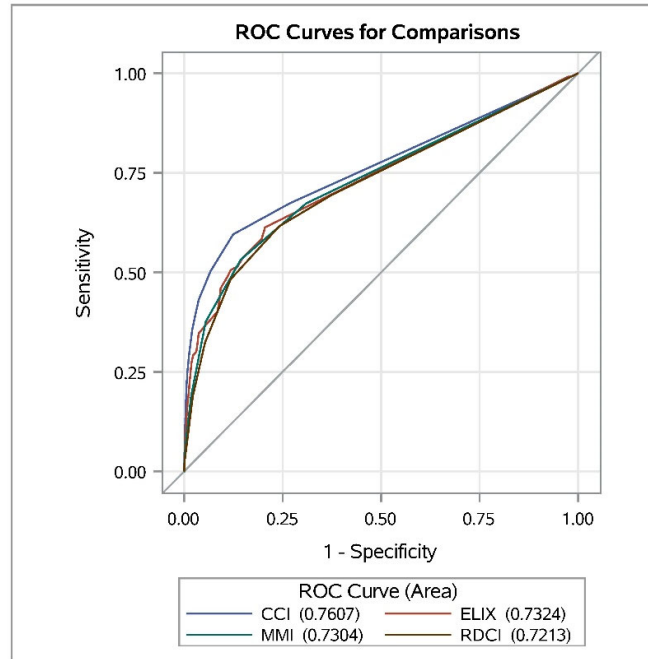

a).

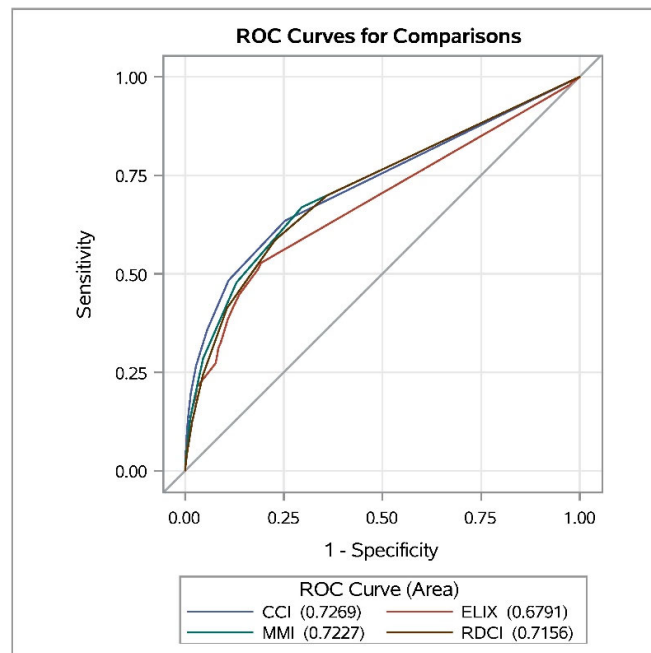

b).

**Figure S5.** Receiver Operating Characteristic (ROC) Curve for Prediction of (a) 1-year mortality and (b) 5-year mortality by four comorbidity indexes in matched control group.
